# Supplementary material for: Personalised 3D Printed Medicines: Optimising Material Properties for Successful Passive Diffusion Loading of Filaments for Fused Deposition Modelling of Solid Dosage Forms
Source: Pharmaceutics. 2020 Apr 11;12(4):345. doi: 10.3390/pharmaceutics12040345 (PMC7238181; doi:10.3390/pharmaceutics12040345)
Supplement: Supplementary file 1 [file pharmaceutics-12-00345-s001.pdf]

Supplementary Material

# Personalised 3D Printed Medicines: Optimising Material Properties for Successful Passive Diffusion Loading of Filaments for Fused Deposition Modelling of Solid Dosage Forms

Jose R. Cerda <sup>1</sup>, Talaya Arifi <sup>2</sup>, Sejad Ayyoubi <sup>1</sup>, Peter Knief <sup>3</sup>, Maria Paloma Ballesteros <sup>1</sup>, William Keeble <sup>4</sup>, Eugen Barbu <sup>2</sup>, Anne Marie Healy <sup>5</sup>, Aikaterini Lalatsa <sup>2</sup> and Dolores R. Serrano <sup>1,\*</sup>

<sup>1</sup> Departament of Pharmaceutics and Food Technology and Instituto Universitario de Farmacia Industrial (IUFI), School of Pharmacy, University Complutense, Avenida Complutense, 28040 Madrid, Spain; jcerda@ucm.es (J.R.C.); sejadayy@gmail.com (S.A.); pballesp@ucm.es (M.P.B.)

<sup>2</sup> Biomaterials, Bio-engineering and Nanomedicine (BioN) Lab, Institute of Biomedical and Biomolecular Sciences, School of Pharmacy and Biomedical Sciences, University of Portsmouth, White Swan Road, Portsmouth PO1 2 DT, UK; talaya.arifi@myport.ac.uk (T.A.); eugen.barbu@port.ac.uk (E.B.); katerina.lalatsa@port.ac.uk (A.L.)

<sup>3</sup> UCD Centre for Precision Surgery, Catherine McAuley Education and Research Centre, Dublin 7, Ireland; peter@knief.de

<sup>4</sup> Faculty of Technology, University of Portsmouth, White Swan Road, Portsmouth PO1 2 DT, UK; william.keeble@port.ac.uk

<sup>5</sup> SSPC The SFI Research Centre for Pharmaceuticals, School of Pharmacy and Pharmaceutical Sciences, Trinity College Dublin, Dublin 2, Ireland; healyam@tcd.ie

\* Correspondence: drserran@ucm.es; Tel.: +34-91-394-1620

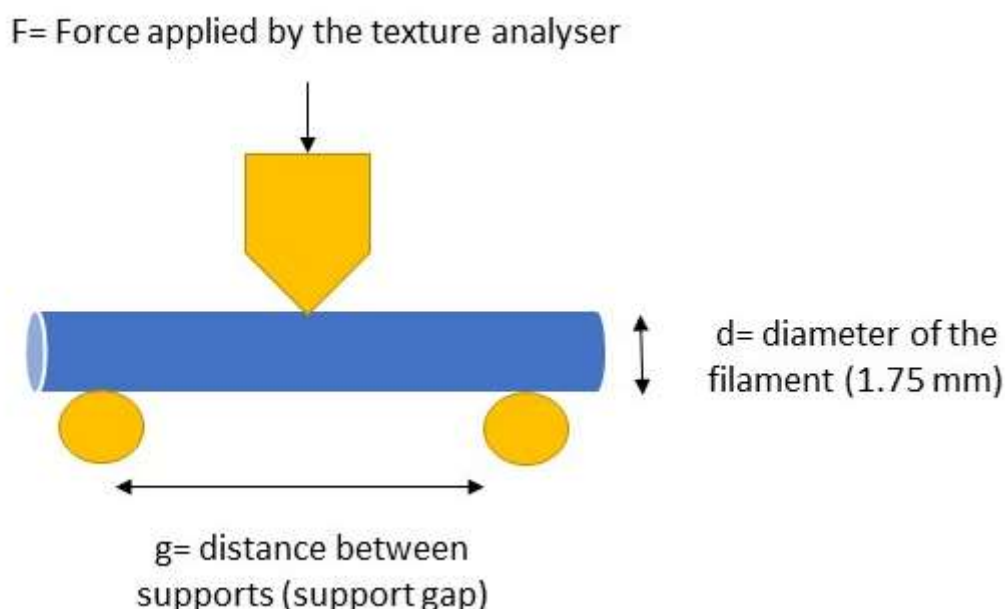

**Figure S1. Three-point bed probe utilised with the texture analyser equipment.** The 3D probe set was printed from PLA and consisted of a rectangular section of 10 x 5 x 2.5 cm attached to an isosceles right-angle triangle on the top (base: 5 x 2.5 cm, height: 1 cm).

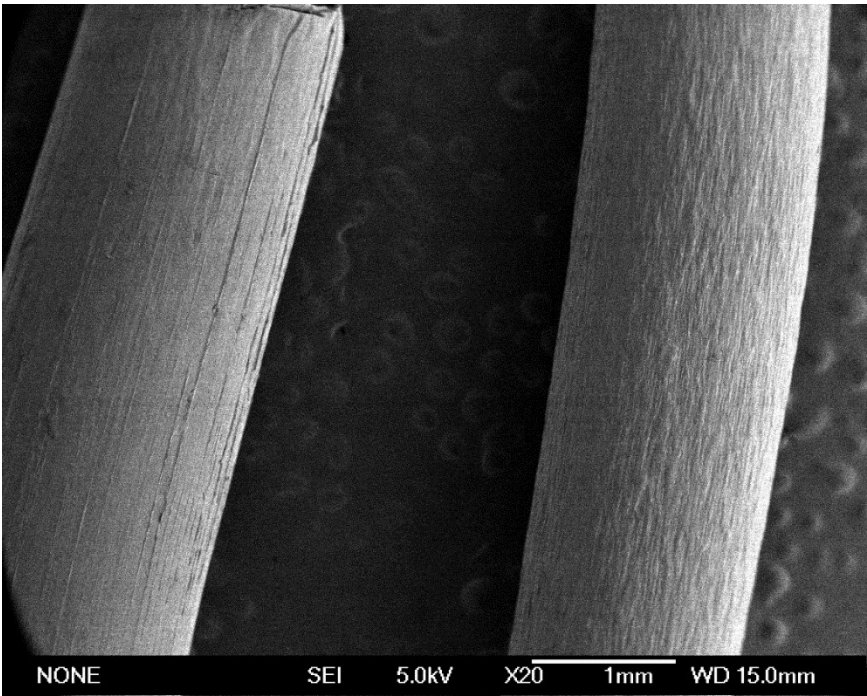

Figure S2. SEM micrographs of HS (left) and PVA (right) blank filaments.

|            | PVA                                                                                 | HS                                                                                  | Combined                                                                             |
|------------|-------------------------------------------------------------------------------------|-------------------------------------------------------------------------------------|--------------------------------------------------------------------------------------|
| Blank      | 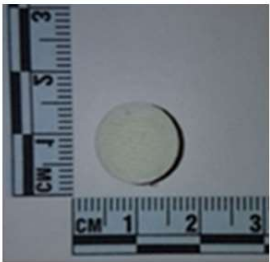 | 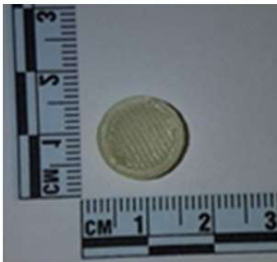 | 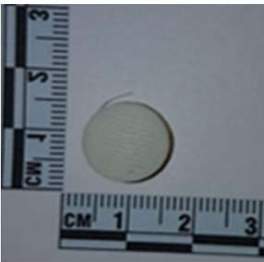 |
| NFD-Loaded | 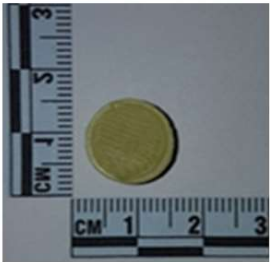 | 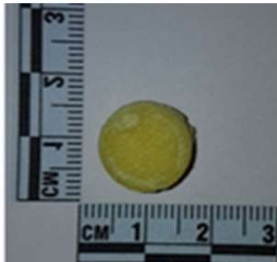 | 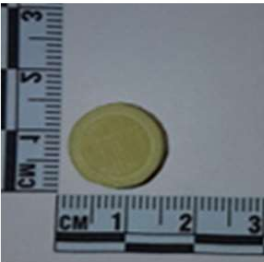 |

Figure S3. Images of 3DP tablets, empty and NFD-loaded, printed from PVA and HS filaments.

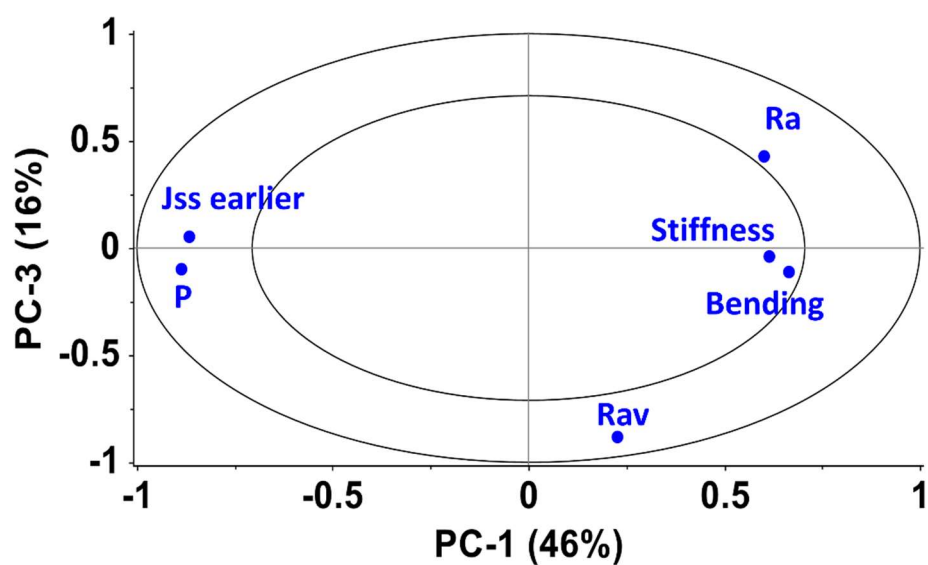

Figure S4. PC1 versus PC3.

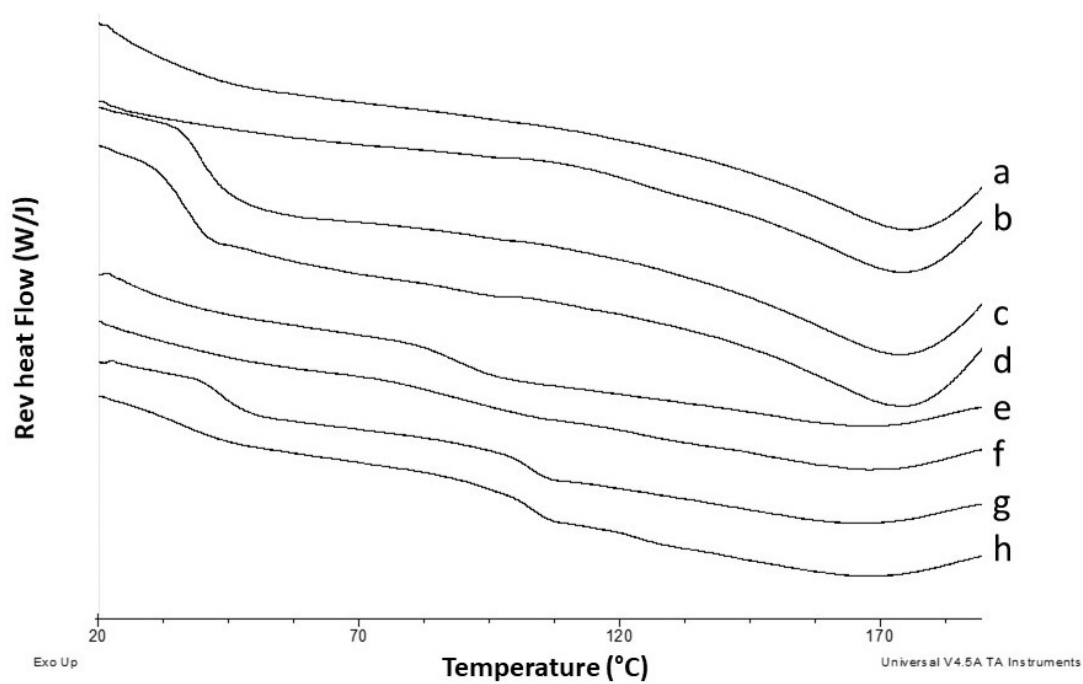

Figure S5. TM-DSC thermograms (reversing signal) of filaments and 3D printed tablets. Key: a- HS NFD-loaded tablet, b- HS NFD-loaded filament, c- HS blank tablet, d- HS blank filament, e- PVA NFD-loaded tablets, f- PVA NFD-loaded filament, g- PVA blank tablet, h- PVA blank filament.

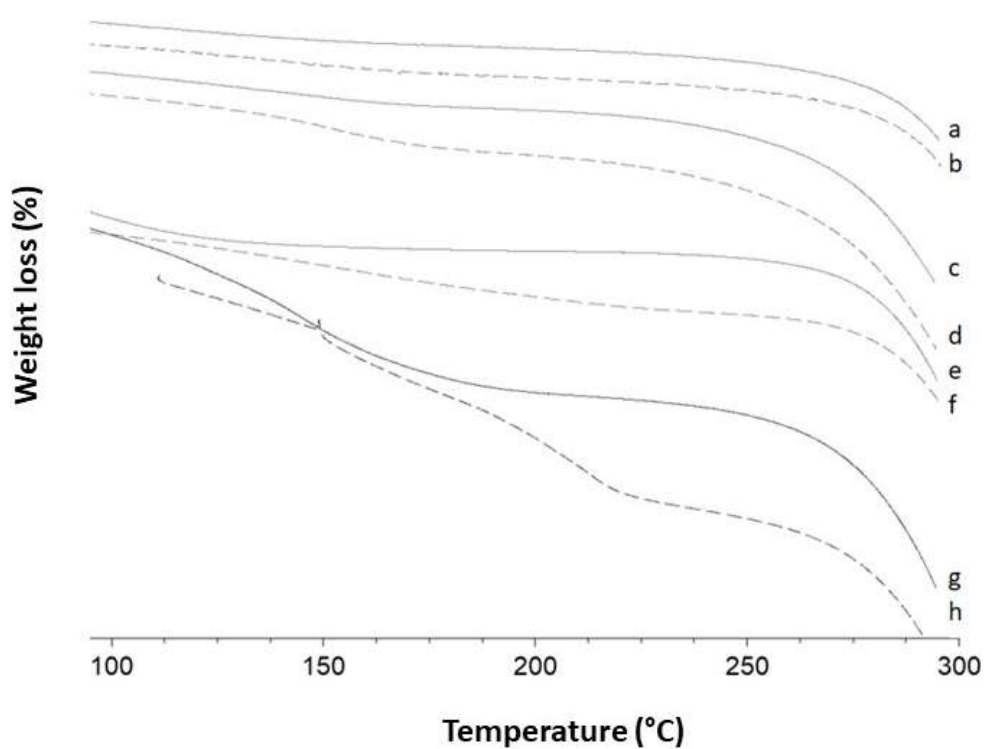

**Figure S6. Thermogravimetric analysis results obtained from filaments and 3DP tablets.** Key: a) PVA blank tablet; b) PVA blank filament; c) PVA NFD-loaded tablet; d) PVA NFD-loaded filament; e) HS blank tablet; f) HS blank filament; g) HS NFD-loaded tablet; h) HS NFD-loaded filament.

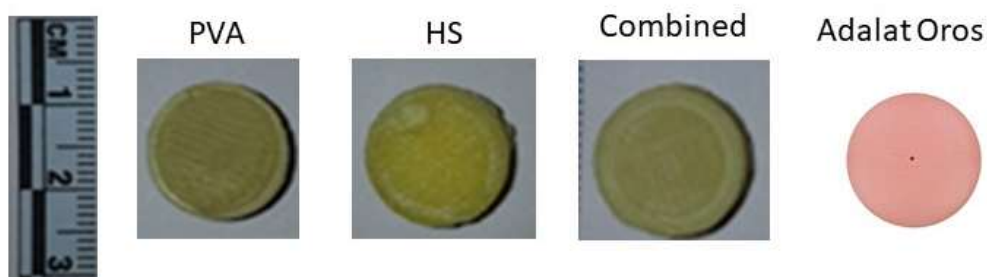

**Figure S7. Size of 3DP tablets compared to Adalat Oros tablet.**

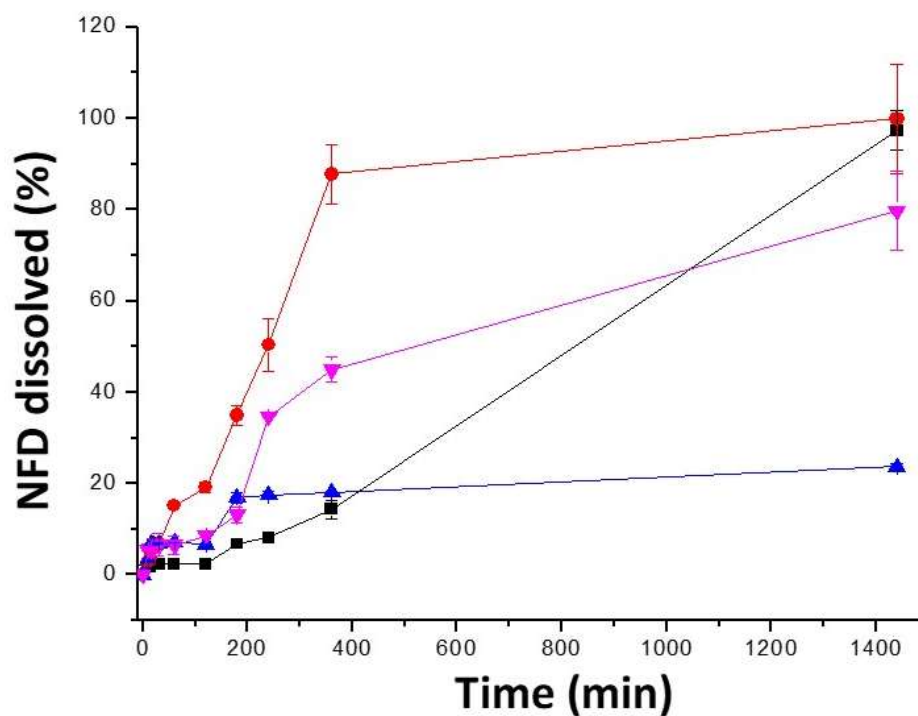

**Figure S8.** Dissolution profile of 3DP tablets compared to NFD commercially available formulations. Key: HS NFD-loaded tablet (red), PVA NFD-loaded tablet (blue), Combined tablet (pink), Adalat Oros (black).

**Table S1.** R<sup>2</sup> data for different kinetic dissolution models (1<sup>st</sup> 6 h).

| System                     | Zero order       | First order | Hixson-Crowell | Korsmeyer-Peppas |
|----------------------------|------------------|-------------|----------------|------------------|
| HS NFD-loaded tablet       | 0.989            | 0.958       | 0.969          | 0.995            |
| PVA NFD-loaded tablet      | 0.899            | 0.906       | 0.904          | 0.933            |
| Combined NFD-loaded tablet | 0.949            | 0.935       | 0.940          | 0.958            |
| Adalat Oros                | 0.989 (for 24 h) | 0.958       | 0.959          | 0.965            |

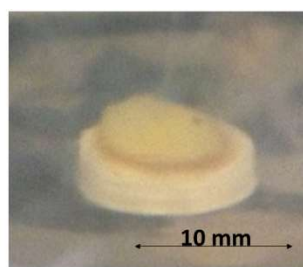

**Figure 9S.** Hybrid tablet during the dissolution study (after 6 h). Top surface corresponds to HS section and bottom part corresponds to PVA section.

**Table S2.** R<sup>2</sup> data for different kinetic stability models.

| <b>T (°C)/ RH (%)</b> | <b>Zero-order</b> | <b>First-order</b> | <b>Second-order</b> | <b>Avrami</b> | <b>Diffusion</b> |
|-----------------------|-------------------|--------------------|---------------------|---------------|------------------|
| 80/75                 | 0.8583            | 0.8624             | 0.8666              | 0.952         | 0.9732           |
| 80/11                 | 0.8224            | 0.8304             | 0.8384              | 0.915         | 0.8829           |
| 70/50                 | 0.9983            | 0.9969             | 0.9951              | 0.9676        | 0.8829           |
| 70/11                 | 0.7215            | 0.7263             | 0.7314              | 0.847         | 0.8829           |
| 60/75                 | 0.9931            | 0.9991             | 0.9995              | 0.8997        | 0.8829           |
| 50/50                 | 0.9946            | 0.9898             | 0.9839              | 0.9372        | 0.8829           |
| HS 3DP tablet         | 0.89803           | 0.90081            | 0.90248             | 0.9197        | 0.8979           |

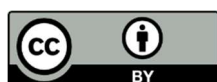

© 2020 by the authors. Submitted for possible open access publication under the terms and conditions of the Creative Commons Attribution (CC BY) license (<http://creativecommons.org/licenses/by/4.0/>).
